# Supplementary material
Source: publisher site journal article supplement (https://www.dovepress.com/article/331776)
Supplement: Supplementary file 1 [file get_supplementary_file.php]

# Appendix (A)

## Table 1: The curriculum of the National Diabetes Prevention Program (Months 1-6)

| **Topic** | | **Date** | **Personal Trainer** |
| --- | --- | --- | --- |
| 1 | Welcome to Tawazon |  |  |
| 2 | Be a Fat and Calorie Detective |  |  |
| 3 | Three Ways to Eat Less Fat and Fewer Calories |  |  |
| 4 | Healthy Eating |  |  |
| 5 | Move those muscles |  |  |
| 6 | Being Active- A way of Life |  |  |
| 7 | Tip the Calorie Balance |  |  |
| 8 | Take Charge of What’s Around You |  |  |
| 9 | Problem Solving |  |  |
| 10 | Four Keys to Healthy Eating Out |  |  |
| 11 | Talk Back to Negative Thoughts |  |  |
| 12 | The Slippery Slope of Lifestyle Change |  |  |
| 13 | Jump Start Your Activity Plan |  |  |
| 14 | Make Social Cues Work for You |  |  |
| 15 | You Can Manage Stress |  |  |
| 16 | Ways to Stay Motivated |  |  |

## Table 2: The curriculum of the National Diabetes Prevention Program (Months 7-12)

| **Topic** | | **Date** | **Personal Trainer** |
| --- | --- | --- | --- |
| 1 | Welcome to Sessions 7-12 |  |  |
| 2 | Fats – Saturated, Unsaturated, and Trans Fat |  |  |
| 3 | Food Preparation and Recipe Modification |  |  |
| 4 | Healthy Eating – Taking it One Meal at a Time |  |  |
| 5 | Healthy Eating with Variety and Balance |  |  |
| 6 | More Volume, Fewer Calories |  |  |
| 7 | Staying on Top of Physical Activity |  |  |
| 8 | Stepping up to Physical Activity |  |  |
| 9 | Balance Your Thoughts for Long-Term Maintenance |  |  |
| 10 | Handling Holidays, Vacations, and Special Events |  |  |
| 11 | Preventing Relapse |  |  |
| 12 | Stress and Time Management |  |  |
| 13 | Heart Health |  |  |
| 14 | A Closer Look at Type 2 Diabetes |  |  |
| 15 | Final Session: Looking Back and Looking Forward |  |  |
